# Supplementary material
Source: publisher site journal article supplement (https://www.spandidos-publications.com/1386/downloadSupplementary)
Supplement: Supplementary file 1 [file downloadSupplementary]

## Sheet: SCI(DMSO) vs Sham
Table SIII. Gene Ontology enrichment analysis of downregulated genes in different groups.
GO_accession	Description	Term_type	Over_represented_pValue	Corrected_pValue	DEG_item	DEG_list	Bg_item	Bg_list	Gene_names
GO:0005515	protein binding	molecular_function	4.9465e-11	2.3827e-07	479	1270	7713	29496	ENSMUSG00000028906|ENSMUSG00000070000|ENSMUSG00000068798|ENSMUSG00000031788|ENSMUSG00000064329|ENSMUSG00000097877|ENSMUSG00000038319|ENSMUSG00000054708|ENSMUSG00000033595|ENSMUSG00000030727|ENSMUSG00000084883|ENSMUSG00000057614|ENSMUSG00000020888|ENSMUSG00000027223|ENSMUSG00000044768|ENSMUSG00000044716|ENSMUSG00000028121|ENSMUSG00000095407|ENSMUSG00000029381|ENSMUSG00000024277|ENSMUSG00000004187|…
GO:0005488	binding	molecular_function	1.6352e-10	3.9384e-07	850	1270	15897	29496	ENSMUSG00000070695|ENSMUSG00000043661|ENSMUSG00000038354|ENSMUSG00000049100|ENSMUSG00000002032|ENSMUSG00000042589|ENSMUSG00000020758|ENSMUSG00000032705|ENSMUSG00000046169|ENSMUSG00000036333|ENSMUSG00000020135|ENSMUSG00000035901|ENSMUSG00000053693|ENSMUSG00000096210|ENSMUSG00000066829|ENSMUSG00000015970|ENSMUSG00000033004|ENSMUSG00000003949|ENSMUSG00000048763|ENSMUSG00000070306|ENSMUSG00000028101|…
GO:0005234	extracellular-glutamate-gated ion channel activity	molecular_function	2.1728e-09	3.4888e-06	12	1270	21	29496	ENSMUSG00000056073|ENSMUSG00000039579|ENSMUSG00000035745|ENSMUSG00000032017|ENSMUSG00000033981|ENSMUSG00000085830|ENSMUSG00000026959|ENSMUSG00000022935|ENSMUSG00000071424|ENSMUSG00000001986|ENSMUSG00000002771|ENSMUSG00000025892
GO:0005231	excitatory extracellular ligand-gated ion channel activity	molecular_function	1.2677e-07	0.00015266	12	1270	30	29496	ENSMUSG00000085830|ENSMUSG00000033981|ENSMUSG00000032017|ENSMUSG00000035745|ENSMUSG00000039579|ENSMUSG00000056073|ENSMUSG00000025892|ENSMUSG00000002771|ENSMUSG00000001986|ENSMUSG00000071424|ENSMUSG00000026959|ENSMUSG00000022935
GO:0005215	transporter activity	molecular_function	1.6939e-07	0.00016319	176	1270	2347	29496	ENSMUSG00000024869|ENSMUSG00000043670|ENSMUSG00000057378|ENSMUSG00000024593|ENSMUSG00000027102|ENSMUSG00000022199|ENSMUSG00000034910|ENSMUSG00000021268|ENSMUSG00000028631|ENSMUSG00000046314|ENSMUSG00000020411|ENSMUSG00000028962|ENSMUSG00000006411|ENSMUSG00000064293|ENSMUSG00000032842|ENSMUSG00000064115|ENSMUSG00000001986|ENSMUSG00000063804|ENSMUSG00000022543|ENSMUSG00000037902|ENSMUSG00000029151|…
GO:0022857	transmembrane transporter activity	molecular_function	9.4976e-07	0.0007625	155	1270	2035	29496	ENSMUSG00000031378|ENSMUSG00000050122|ENSMUSG00000063765|ENSMUSG00000026141|ENSMUSG00000001833|ENSMUSG00000068323|ENSMUSG00000037578|ENSMUSG00000047037|ENSMUSG00000057914|ENSMUSG00000037656|ENSMUSG00000064202|ENSMUSG00000026932|ENSMUSG00000064329|ENSMUSG00000038267|ENSMUSG00000038319|ENSMUSG00000038077|ENSMUSG00000068747|ENSMUSG00000053007|ENSMUSG00000050138|Novel00346|ENSMUSG00000019894|Novel005…
GO:0004970	ionotropic glutamate receptor activity	molecular_function	3.7927e-06	0.0022214	12	1270	40	29496	ENSMUSG00000071424|ENSMUSG00000022935|ENSMUSG00000026959|ENSMUSG00000025892|ENSMUSG00000002771|ENSMUSG00000001986|ENSMUSG00000039579|ENSMUSG00000035745|ENSMUSG00000032017|ENSMUSG00000056073|ENSMUSG00000085830|ENSMUSG00000033981
GO:0008066	glutamate receptor activity	molecular_function	3.7927e-06	0.0022214	12	1270	40	29496	ENSMUSG00000056073|ENSMUSG00000032017|ENSMUSG00000039579|ENSMUSG00000035745|ENSMUSG00000033981|ENSMUSG00000085830|ENSMUSG00000022935|ENSMUSG00000026959|ENSMUSG00000071424|ENSMUSG00000002771|ENSMUSG00000001986|ENSMUSG00000025892
GO:0022891	substrate-specific transmembrane transporter activity	molecular_function	4.1505e-06	0.0022214	139	1270	1825	29496	ENSMUSG00000027956|ENSMUSG00000029211|ENSMUSG00000056755|ENSMUSG00000002771|ENSMUSG00000020758|ENSMUSG00000038497|ENSMUSG00000036333|ENSMUSG00000048163|ENSMUSG00000033981|ENSMUSG00000038354|ENSMUSG00000042589|ENSMUSG00000000948|ENSMUSG00000036242|ENSMUSG00000032064|ENSMUSG00000051811|ENSMUSG00000000197|ENSMUSG00000027895|ENSMUSG00000070306|ENSMUSG00000047875|ENSMUSG00000026959|ENSMUSG00000030495|…
GO:0022892	substrate-specific transporter activity	molecular_function	5.9466e-06	0.0028645	146	1270	1963	29496	ENSMUSG00000047037|ENSMUSG00000057914|ENSMUSG00000064202|ENSMUSG00000026932|ENSMUSG00000038319|ENSMUSG00000064329|ENSMUSG00000038077|ENSMUSG00000050138|ENSMUSG00000053007|ENSMUSG00000068747|ENSMUSG00000026141|ENSMUSG00000001833|ENSMUSG00000063765|ENSMUSG00000068323|ENSMUSG00000037578|ENSMUSG00000021268|ENSMUSG00000046314|ENSMUSG00000020411|ENSMUSG00000028631|ENSMUSG00000028962|ENSMUSG00000006411|…
GO:0003993	acid phosphatase activity	molecular_function	1.0179e-05	0.0044573	23	1270	132	29496	ENSMUSG00000032816|ENSMUSG00000026235|ENSMUSG00000037139|ENSMUSG00000022883|ENSMUSG00000022762|ENSMUSG00000038119|ENSMUSG00000039488|ENSMUSG00000028661|ENSMUSG00000064293|ENSMUSG00000032537|ENSMUSG00000034648|ENSMUSG00000030092|ENSMUSG00000028399|ENSMUSG00000015829|ENSMUSG00000040648|ENSMUSG00000053024|ENSMUSG00000029869|ENSMUSG00000060534|ENSMUSG00000028876|ENSMUSG00000033526|ENSMUSG00000020758|…
GO:0015075	ion transmembrane transporter activity	molecular_function	1.227e-05	0.0046931	132	1270	1741	29496	ENSMUSG00000051166|ENSMUSG00000085830|Novel00159|ENSMUSG00000031129|ENSMUSG00000045246|ENSMUSG00000040990|ENSMUSG00000068329|ENSMUSG00000020723|ENSMUSG00000060961|ENSMUSG00000031558|ENSMUSG00000040867|ENSMUSG00000079022|ENSMUSG00000020544|ENSMUSG00000014786|ENSMUSG00000041710|ENSMUSG00000026614|ENSMUSG00000026904|ENSMUSG00000090256|ENSMUSG00000051910|ENSMUSG00000020331|ENSMUSG00000035745|ENSMUSG0…
GO:0006811	ion transport	biological_process	1.2666e-05	0.0046931	131	1270	1706	29496	ENSMUSG00000064293|ENSMUSG00000028962|ENSMUSG00000006411|ENSMUSG00000064115|ENSMUSG00000030849|ENSMUSG00000034910|ENSMUSG00000021268|ENSMUSG00000046314|ENSMUSG00000020411|ENSMUSG00000028631|ENSMUSG00000024593|ENSMUSG00000043670|ENSMUSG00000057378|ENSMUSG00000027102|ENSMUSG00000024869|ENSMUSG00000042834|Novel00515|Novel00060|ENSMUSG00000037902|ENSMUSG00000029151|ENSMUSG00000022843|ENSMUSG000000273…
GO:0043167	ion binding	molecular_function	4.5087e-05	0.015513	424	1270	7154	29496	ENSMUSG00000020747|ENSMUSG00000052861|ENSMUSG00000035829|ENSMUSG00000022311|ENSMUSG00000026792|ENSMUSG00000073423|ENSMUSG00000029095|Novel00563|ENSMUSG00000038145|ENSMUSG00000028469|ENSMUSG00000028093|ENSMUSG00000092624|ENSMUSG00000024030|ENSMUSG00000037370|ENSMUSG00000030108|ENSMUSG00000066842|ENSMUSG00000054252|ENSMUSG00000018427|ENSMUSG00000038119|ENSMUSG00000034687|ENSMUSG00000028197|ENSMUSG0…
GO:0006013	mannose metabolic process	biological_process	4.9688e-05	0.015956	4	1270	5	29496	ENSMUSG00000005142|ENSMUSG00000032295|ENSMUSG00000038886|ENSMUSG00000029119
GO:0008484	sulfuric ester hydrolase activity	molecular_function	6.4441e-05	0.019401	8	1270	25	29496	ENSMUSG00000022620|ENSMUSG00000037370|ENSMUSG00000020604|ENSMUSG00000019989|ENSMUSG00000023960|ENSMUSG00000022425|ENSMUSG00000038173|ENSMUSG00000042082
GO:0016787	hydrolase activity	molecular_function	0.0001153	0.032672	284	1270	4550	29496	ENSMUSG00000022543|ENSMUSG00000028876|ENSMUSG00000025437|ENSMUSG00000018474|ENSMUSG00000057378|ENSMUSG00000084202|ENSMUSG00000021134|ENSMUSG00000032842|ENSMUSG00000028661|ENSMUSG00000020263|ENSMUSG00000044768|ENSMUSG00000041797|ENSMUSG00000004187|ENSMUSG00000049538|ENSMUSG00000028528|ENSMUSG00000027188|ENSMUSG00000019989|ENSMUSG00000001833|ENSMUSG00000031788|ENSMUSG00000068798|ENSMUSG00000017639|…
GO:0003824	catalytic activity	molecular_function	0.00015805	0.042296	565	1270	10492	29496	ENSMUSG00000048029|ENSMUSG00000052516|ENSMUSG00000040752|ENSMUSG00000031816|ENSMUSG00000078570|ENSMUSG00000097715|ENSMUSG00000042988|ENSMUSG00000066113|ENSMUSG00000026170|ENSMUSG00000042678|ENSMUSG00000044005|ENSMUSG00000034000|ENSMUSG00000022883|Novel00553|ENSMUSG00000043670|ENSMUSG00000031734|ENSMUSG00000021268|ENSMUSG00000064293|ENSMUSG00000006411|ENSMUSG00000046152|ENSMUSG00000027318|ENSMUSG0…

## Sheet: SCI(VX-765)vsSCI(DMSO).
Table SIII. Gene Ontology enrichment analysis of downregulated genes in different groups.
GO_accession	Description	Term_type	Over_represented_pValue	Corrected_pValue	DEG_item	DEG_list	Bg_item	Bg_list	Gene_names
GO:0005488	binding	molecular_function	8.3759e-25	4.0347e-21	1082	1521	15897	29496	ENSMUSG00000044562|ENSMUSG00000026031|ENSMUSG00000040732|ENSMUSG00000035352|ENSMUSG00000057143|ENSMUSG00000046841|ENSMUSG00000028128|ENSMUSG00000057101|ENSMUSG00000002688|ENSMUSG00000070327|ENSMUSG00000044827|ENSMUSG00000026979|ENSMUSG00000041959|ENSMUSG00000041515|ENSMUSG00000002948|ENSMUSG00000031565|ENSMUSG00000028874|ENSMUSG00000070426|ENSMUSG00000025780|ENSMUSG00000053841|ENSMUSG00000073489|…
GO:0005515	protein binding	molecular_function	3.187e-22	7.676e-19	623	1521	7713	29496	ENSMUSG00000064080|ENSMUSG00000030187|ENSMUSG00000050132|ENSMUSG00000024456|ENSMUSG00000026547|ENSMUSG00000045930|ENSMUSG00000029561|ENSMUSG00000040490|ENSMUSG00000024300|ENSMUSG00000063388|ENSMUSG00000005268|ENSMUSG00000067336|ENSMUSG00000032691|ENSMUSG00000022146|ENSMUSG00000069755|ENSMUSG00000038224|ENSMUSG00000004791|ENSMUSG00000054150|ENSMUSG00000061458|ENSMUSG00000025085|ENSMUSG00000017057|…
GO:0003674	molecular_function	molecular_function	4.3724e-08	7.0205e-05	1392	1521	25001	29496	ENSMUSG00000034165|ENSMUSG00000002332|ENSMUSG00000054676|ENSMUSG00000020256|ENSMUSG00000022220|ENSMUSG00000030711|ENSMUSG00000025958|ENSMUSG00000031207|ENSMUSG00000020137|ENSMUSG00000026315|ENSMUSG00000046908|ENSMUSG00000058587|ENSMUSG00000044103|ENSMUSG00000094497|ENSMUSG00000035673|ENSMUSG00000020061|ENSMUSG00000019774|ENSMUSG00000029538|ENSMUSG00000026600|ENSMUSG00000023959|ENSMUSG00000055172|…
GO:0043167	ion binding	molecular_function	2.5136e-07	0.0003027	518	1521	7154	29496	ENSMUSG00000030905|ENSMUSG00000022969|ENSMUSG00000020375|ENSMUSG00000046668|ENSMUSG00000071281|ENSMUSG00000036273|ENSMUSG00000000530|ENSMUSG00000001280|ENSMUSG00000023885|ENSMUSG00000071715|ENSMUSG00000051506|ENSMUSG00000031673|ENSMUSG00000015143|ENSMUSG00000110444|ENSMUSG00000024276|ENSMUSG00000024759|ENSMUSG00000039167|ENSMUSG00000033792|ENSMUSG00000060257|ENSMUSG00000024620|ENSMUSG00000027435|…
GO:0007264	small GTPase mediated signal transduction	biological_process	4.0243e-06	0.003877	51	1521	432	29496	ENSMUSG00000019066|ENSMUSG00000026482|ENSMUSG00000026979|ENSMUSG00000004568|ENSMUSG00000059248|ENSMUSG00000031799|ENSMUSG00000036894|ENSMUSG00000074364|ENSMUSG00000041696|ENSMUSG00000063388|ENSMUSG00000024998|ENSMUSG00000028059|ENSMUSG00000032849|ENSMUSG00000021215|ENSMUSG00000048960|ENSMUSG00000015133|ENSMUSG00000052681|ENSMUSG00000073555|ENSMUSG00000043463|ENSMUSG00000036885|ENSMUSG00000033542|…
GO:0035556	intracellular signal transduction	biological_process	1.2272e-05	0.0094018	96	1521	979	29496	ENSMUSG00000039831|ENSMUSG00000054855|ENSMUSG00000034037|ENSMUSG00000071281|ENSMUSG00000052430|ENSMUSG00000026821|ENSMUSG00000113450|ENSMUSG00000036273|ENSMUSG00000021108|ENSMUSG00000031264|ENSMUSG00000022994|ENSMUSG00000069874|ENSMUSG00000037552|ENSMUSG00000064147|ENSMUSG00000020120|ENSMUSG00000059013|ENSMUSG00000059142|ENSMUSG00000046768|ENSMUSG00000034226|ENSMUSG00000032202|ENSMUSG00000058006|…
GO:0016740	transferase activity	molecular_function	1.3663e-05	0.0094018	298	1521	3930	29496	ENSMUSG00000030921|ENSMUSG00000046699|ENSMUSG00000029570|ENSMUSG00000032849|ENSMUSG00000059883|ENSMUSG00000030110|ENSMUSG00000020697|ENSMUSG00000029561|ENSMUSG00000063388|ENSMUSG00000067336|ENSMUSG00000004056|ENSMUSG00000003746|ENSMUSG00000039954|ENSMUSG00000028487|ENSMUSG00000024978|ENSMUSG00000028862|ENSMUSG00000031196|ENSMUSG00000039242|ENSMUSG00000042671|ENSMUSG00000004356|ENSMUSG00000029798|…
GO:0008373	sialyltransferase activity	molecular_function	1.8012e-05	0.010846	9	1521	24	29496	ENSMUSG00000052544|ENSMUSG00000025425|ENSMUSG00000040710|ENSMUSG00000032038|ENSMUSG00000056812|ENSMUSG00000057286|ENSMUSG00000013846|ENSMUSG00000039037|ENSMUSG00000020123
GO:0003950	NAD+ ADP-ribosyltransferase activity	molecular_function	4.5507e-05	0.024356	8	1521	25	29496	ENSMUSG00000022906|ENSMUSG00000034422|ENSMUSG00000038507|ENSMUSG00000026496|ENSMUSG00000023249|ENSMUSG00000032392|ENSMUSG00000037997|ENSMUSG00000063268
GO:0005576	extracellular region	cellular_component	6.9835e-05	0.033639	156	1521	2208	29496	ENSMUSG00000030830|ENSMUSG00000032531|ENSMUSG00000014496|ENSMUSG00000027009|ENSMUSG00000048534|ENSMUSG00000040296|ENSMUSG00000018927|ENSMUSG00000009905|ENSMUSG00000021994|ENSMUSG00000054693|ENSMUSG00000040125|ENSMUSG00000026447|ENSMUSG00000026193|ENSMUSG00000027398|ENSMUSG00000051444|ENSMUSG00000047496|ENSMUSG00000028362|ENSMUSG00000021702|ENSMUSG00000000223|ENSMUSG00000091243|ENSMUSG00000020932|…
